# Supplementary material
Source: MDPI journal article supplement (https://www.mdpi.com/2073-4433/9/3/93)
Supplement: s1 [file s1]

# Long-term analysis of Aerosol Optical Depth over the Huaihai Economic Region (HER): Possible causes and Implications

Yang Shen <sup>1</sup>, Lianpeng Zhang <sup>1,\*</sup>, Xing Fang <sup>1</sup>, Zhuowen Zhao <sup>2</sup>, Xing Li <sup>1</sup>, Jiahui Wang <sup>1</sup>, Qi Chai <sup>1</sup>

<sup>1</sup> School of Geography, Geomatics and Planning, Jiangsu Normal University, Xuzhou 221116, China; y\_shen@yeah.net (Y.S.); xing\_f@yeah.net (X.F.); lixing@jsnu.edu.cn (X.L.); moziye@outlook.com (J.W.); ailsachai2017@163.com (Q.C.);

<sup>2</sup> Jiangsu Provincial Bureau of Surveying Mapping and Geoinformation; Nanjing 210013, China; zhuow\_z@yeah.net

\* Correspondence: zhanglp2000@126.com

## 1 The data processing of AOD

We extracted the 550-nm spectral data from a daily 10-km aerosol dataset. Data processing mainly includes projection, mosaic, vector cropping for Huaihai Economic Region (HER) and averaging operations with ArcGIS 10.3. The monthly mean AOD values were calculated by using daily data as

$$\bar{x} = \frac{\sum x_i}{n} \quad (1)$$

where  $x_i$  is the daily AOD value, and  $n$  is the number of days. By using (1), we also obtained seasonal and multi-year averaged AOD data.

Table S1. The fire points of straw burning monitored by environmental and meteorological satellites in summer of 2014 and 2015.

| Province | Summer 2014 | Summer 2015 | Change rate <sup>a</sup> |
|----------|-------------|-------------|--------------------------|
| Jiangsu  | 53          | 5           | -90.57%                  |
| Shandong | 230         | 185         | -19.57%                  |
| Henan    | 815         | 512         | -37.18%                  |
| Anhui    | 644         | 32          | -95.03%                  |

<sup>a</sup> Compared to the same period in 2014.

Table S2. Remote sensing monitoring Daily for fire points of straw burning.

| Province | 2010.6.25 | 2011.6.16 | 2013.6.15 | 2016.6.15-6.16 | 2017.6.15 |
|----------|-----------|-----------|-----------|----------------|-----------|
| Jiangsu  | 25        | 72        | 11        |                |           |
| Shandong | 11        | 24        | 38        | 7              | 6         |
| Henan    | 2         | 27        | 52        | 2              |           |
| Anhui    | 75        | 20        | 124       |                |           |

Table S3. Correlation coefficients between different natural factors.

| Variables <sup>b</sup> | SD | P     | AWS     | AT             | ARH            | NDVI           |
|------------------------|----|-------|---------|----------------|----------------|----------------|
| SD                     | 1  | 0.033 | 0.234** | 0.482**        | -0.446**       | 0.402**        |
| P                      |    | 1     | -0.161* | <b>0.740**</b> | <b>0.673**</b> | 0.592**        |
| AWS                    |    |       | 1       | -0.194**       | -0.381**       | -0.257**       |
| AT                     |    |       |         | 1              | 0.465**        | <b>0.724**</b> |
| ARH                    |    |       |         |                | 1              | 0.358**        |
| NDVI                   |    |       |         |                |                | 1              |

\*.p<0.05; \*\*.p<0.01.

<sup>b</sup> AWS, average wind speed; SD, sunshine duration; P, precipitation; ARH, average relative humidity; AT, average temperature; NDVI, normalized difference vegetation index.
